# Supplementary material for: Diversity and Ecology of Thrips (Thysanoptera, Insecta) Assemblages in Słowiński National Park—A Biosphere Reserve on the Baltic Coast (Northern Poland)
Source: MDPI journal article supplement (doi:10.3390/insects17010119), 2026-01-21
Supplement: s1 [file Table S1. Checklist_distribution-ecology.pdf › Table S1. Checklist_distribution-ecology.pdf]

**Table S1.** The distribution and ecology characteristics of thrips species collected in the Słowiński National Park

| Thrips species                                           | Distribution | Ecology       |
|----------------------------------------------------------|--------------|---------------|
| 1. <i>Aeolothrips albicinctus</i> Haliday                | HOL          | gr, pol       |
| 2. <i>Aeolothrips ericae</i> Bagnall                     | HOL          | fl, ol        |
| 3. <i>Aeolothrips fasciatus</i> (Linnaeus)               | HOL          | zoo, pol, fl  |
| 4. <i>Aeolothrips intermedius</i> Bagnall                | PAL          | zoo, pol, fl  |
| 5. <i>Aeolothrips melaleucus</i> Haliday                 | HOL          | zoo, ol, ar   |
| 6. <i>Aeolothrips versicolor</i> Uzel                    | HOL          | fol, ol, ar   |
| 7. <i>Anaphothrips badius</i> Williams                   | EUR          | fol, ol, hig  |
| 8. <i>Anaphothrips obscurus</i> (Müller)                 | COS          | gr, ol        |
| 9. <i>Aptinothrips rufus</i> (Haliday)                   | COS          | gr, pol       |
| 10. <i>Aptinothrips stylifer</i> Trybom                  | HOL          | gr, pol       |
| 11. <i>Baliothrips dispar</i> (Haliday)                  | EUS          | fol, pol, hig |
| 12. <i>Bolacothrips jordani</i> Uzel                     | EUR          | gr, pol       |
| 13. <i>Ctenothrips distinctus</i> (Uzel)                 | EUR          | fol, mon      |
| 14. <i>Ceratothrips ericae</i> (Haliday)                 | HOL          | fl, ol        |
| 15. <i>Chirothrips hamatus</i> Trybom                    | HOL          | gr, pol, hig  |
| 16. <i>Chirothrips manicatus</i> Haliday                 | HOL          | gr, pol       |
| 17. <i>Chirothrips pallidicornis</i> (Priesner)          | EUR          | gr, pol       |
| 18. <i>Dendrothrips degeeri</i> Uzel                     | EUR          | fol, ol, ar   |
| 19. <i>Dendrothrips saltatrix</i> Uzel                   | EUR+ASIA     | fol, pol, ar  |
| 20. <i>Euchaetothrips kroli</i> (Schille)                | EUR          | gr, ol, hig   |
| 21. <i>Frankliniella intonsa</i> (Trybom)                | COS          | fl, pol       |
| 22. <i>Frankliniella tenuicornis</i> (Uzel)              | COS          | gr, pol       |
| 23. <i>Hemianaphothrips articulatus</i> Priesner         | EUR          | gr, ol, hig   |
| 24. <i>Iridothrips iridis</i> (Watson)                   | EUR          | fol, mon, hig |
| 25. <i>Limothrips cerealium</i> Haliday                  | COS          | gr, pol       |
| 26. <i>Limothrips denticornis</i> Haliday                | HOL          | gr, pol       |
| 27. <i>Mycterothrips albidicornis</i> (Knechtel)         | EUR          | fol, ol, ar   |
| 28. <i>Mycterothrips consociatus</i> (Targioni-Tozzetti) | PAL          | fol, ol, ar   |
| 29. <i>Mycterothrips latus</i> Bagnall                   | EUS          | fol, ol, ar   |
| 30. <i>Mycterothrips salicis</i> (O.M.Reuter)            | EUS          | fol, ol, ar   |
| 31. <i>Neohydatothrips gracilicornis</i> (Williams)      | PAL          | gr, ol        |
| 32. <i>Oxythrips ajugae</i> (Uzel)                       | EUR          | fol, ol, ar   |
| 33. <i>Oxythrips bicolor</i> (O.M. Reuter)               | EUR          | fol, ol, ar   |
| 34. <i>Pelikanothrips kratochvili</i> (Pelikán)          | EUR          | fol, ol, hig  |
| 35. <i>Pezothrips frontalis</i> (Uzel)                   | EUR          | fol, ol, xer  |
| 36. <i>Platythrips tunicatus</i> (Haliday)               | EUR          | fl, ol        |
| 37. <i>Rhaphidothrips longistylus</i> Uzel               | HOL          | gr, pol       |
| 38. <i>Rubiothrips ferrugineus</i> (Uzel)                | EUR          | fl, ol        |
| 39. <i>Rubiothrips silvarum</i> (Priesner)               | EUS          | fl, mon, xer  |
| 40. <i>Rubiothrips sordidus</i> (Uzel)                   | EUS          | fl, ol        |
| 41. <i>Scolothrips longicornis</i> (Priesner)            | HOL          | fol, pol, zoo |
| 42. <i>Scolothrips uzeli</i> Schille                     | EUR          | fl, mon, zoo  |
| 43. <i>Sericothrips bicornis</i> (Karny)                 | EUR          | fl, ol        |
| 44. <i>Taeniothrips picipes</i> (Zetterstedt)            | W-PAL        | fl, pol       |
| 45. <i>Taeniothrips zurstrasseni</i> Zawirska            | EUR          | fl, mon       |
| 46. <i>Tenothrips frici</i> (Uzel)                       | PAL          | fl, pol       |
| 47. <i>Theilopodothrips pilosus</i> (Uzel)               | EUR          | fl, ol, xer   |

|                                                     |          |                   |
|-----------------------------------------------------|----------|-------------------|
| 48. <i>Thrips alni</i> Uzel                         | EUR      | fol, mon, ar      |
| 49. <i>Thrips angusticeps</i> Uzel                  | W-PAL    | fl, pol           |
| 50. <i>Thrips atratus</i> (Haliday)                 | HOL      | fl, pol           |
| 51. <i>Thrips difficilis</i> Priesner               | EUR      | fol, ol, ar       |
| 52. <i>Thrips dilatatus</i> Uzel                    | EUS      | fl, ol            |
| 53. <i>Thrips discolor</i> Haliday                  | EUR      | fl, mon, hig      |
| 54. <i>Thrips flavus</i> Schrank                    | COS      | fl, pol           |
| 55. <i>Thrips fuscipennis</i> Haliday               | PAL      | fl, fol, pol      |
| 56. <i>Thrips juniperinus</i> Linnaeus              | EUR      | fl, mon, ar       |
| 57. <i>Thrips major</i> Uzel                        | PAL      | fl, fol, pol      |
| 58. <i>Thrips mancosetosus</i> (Priesner)           | EUR      | fl, mon, hig      |
| 59. <i>Thrips menyanthidis</i> Bagnall              | EUR      | fol, mon, hig     |
| 60. <i>Thrips minutissimus</i> Linnaeus             | EUR+ASIA | fol, ol, ar       |
| 61. <i>Thrips montanus</i> (Priesner)               | EUR      | fl, mon           |
| 62. <i>Thrips nigropilosus</i> Uzel                 | EUR+ASIA | fl, fol, pol      |
| 63. <i>Thrips physapus</i> Linnaeus                 | EUS      | fl, pol           |
| 64. <i>Thrips pilichi</i> Priesner                  | EUR      | fl, ol            |
| 65. <i>Thrips pini</i> (Uzel)                       | HOL      | fl, fol, ol, ar   |
| 66. <i>Thrips sambuci</i> Heeger                    | EUR      | fol, mon, ar      |
| 67. <i>Thrips tabaci</i> Lindeman                   | COC      | fl, fol, pol      |
| 68. <i>Thrips trehernei</i> Priesner                | HOL      | fl, pol           |
| 69. <i>Thrips urticae</i> Fabricius                 | EUR      | fl, mon           |
| 70. <i>Thrips validus</i> Uzel                      | EUR+ASIA | fl, pol           |
| 71. <i>Thrips vulgatissimus</i> (Haliday)           | EUR      | fl, ol            |
| 72. <i>Tmetothrips subapterus</i> (Haliday)         | EUR      | fol, ol, hig      |
| 73. <i>Bolothrips dentipes</i> (O.M.Reuter)         | EUR      | gr, ol, hig       |
| 74. <i>Bolothrips icarus</i> (Uzel)                 | EUR      | gr, ol, xer       |
| 75. <i>Cephalothrips monilicornis</i> (O.M. Reuter) | HOL      | gr, ol            |
| 76. <i>Haplothrips aculeatus</i> (Fabricius)        | PAL      | gr, pol           |
| 77. <i>Haplothrips arenarius</i> Priesner           | EUR      | fl, mon, xer      |
| 78. <i>Haplothrips distinguendus</i> (Uzel)         | EUR+ASIA | fl, fol, pol      |
| 79. <i>Haplothrips jasionis</i> Priesner            | EUR      | fl, mon, xer      |
| 80. <i>Haplothrips leucanthemi</i> (Schrank)        | HOL      | fl, mon           |
| 81. <i>Haplothrips niger</i> (Osborn)               | PAL      | fl, ol            |
| 82. <i>Haplothrips phyllophilus</i> Priesner        | EUR      | fol, pol, ar, cor |
| 83. <i>Haplothrips statices</i> (Haliday)           | EUR      | fl, mon, xer      |
| 84. <i>Haplothrips subtilissimus</i> (Haliday)      | PAL      | fol, pol, cor, ar |
| 85. <i>Hoplothrips corticis</i> (De Geer)           | HOL      | mf, ol, ar, cor   |
| 86. <i>Hoplothrips pedicularius</i> (Haliday)       | EUR      | mf, ol, ar, cor   |
| 87. <i>Liothrips setinodis</i> (O.M. Reuter)        | EUR      | fol, ol, ar       |
| 88. <i>Megathrips lativentris</i> (Heeger)          | EUR      | mf, ol, ar, cor   |
| 89. <i>Phlaeothrips coriaceus</i> Haliday           | EUR      | mf, ol, ar, cor   |
| 90. <i>Xylaplothrips fuliginosus</i> (Schille)      | EUR      | zoo, ar, cor      |

Abbreviations: **distribution** – COS – cosmopolite, EUR – European, EUR+ASIA – European and Asian, EUS – Eurosiberian, HOL – Holarctic, PAL – Palearctic, W-PAL – West-Palearctic; **ecology** – mo – monophagous, ol – oligophagous, pol – polyphagous, fl – floricolous, fol – foliicolous, gr – graminicolous, zoo – zoophagous, ar – arboricolous, hig – higrophilous, xer – termophilous, cor – corticolous, mf – mycophagous, ar – arboricolous
