# Supplementary material for: Diversity and Ecology of Thrips (Thysanoptera, Insecta) Assemblages in Słowiński National Park—A Biosphere Reserve on the Baltic Coast (Northern Poland)
Source: MDPI journal article supplement (doi:10.3390/insects17010119), 2026-01-21
Supplement: s1 [file Table S2. Checklist of plant species.pdf › Table S2. Checklist of plant species.pdf]

**Table S2.** Checklist of plant families, plant species, and thrips species collected on particular plants (qualitative studies) in the Słowiński National Park

| Plant family        | Plant species                | Thysanoptera species                                                                                                                                                                                                                                                                                                                                                                                                                                                              |
|---------------------|------------------------------|-----------------------------------------------------------------------------------------------------------------------------------------------------------------------------------------------------------------------------------------------------------------------------------------------------------------------------------------------------------------------------------------------------------------------------------------------------------------------------------|
| <i>Apiaceae</i>     | <i>Anthriscus sylvestris</i> | <i>Haplothrips aculeatus</i><br><i>Limothrips denticornis</i><br><i>Thrips fuscipennis</i><br><i>Thrips minutissimus</i><br><i>Thrips physapus</i><br><i>Thrips tabaci</i><br><i>Thrips vulgatissimus</i>                                                                                                                                                                                                                                                                         |
| <i>Apiaceae</i>     | <i>Daucus carota</i>         | <i>Thrips fuscipennis</i><br><i>Thrips tabaci</i>                                                                                                                                                                                                                                                                                                                                                                                                                                 |
| <i>Asparagaceae</i> | <i>Convallaria majalis</i>   | <i>Ctenothrips distinctus</i>                                                                                                                                                                                                                                                                                                                                                                                                                                                     |
| <i>Asteraceae</i>   | <i>Achillea millefolium</i>  | <i>Thrips tabaci</i>                                                                                                                                                                                                                                                                                                                                                                                                                                                              |
| <i>Asteraceae</i>   | <i>Cirsium arvense</i>       | <i>Ceratothrips ericae</i><br><i>Chirothrips manicatus</i><br><i>Frankliniella intonsa</i><br><i>Haplothrips aculeatus</i><br><i>Haplothrips jasionis</i><br><i>Mycterothrips consociatus</i><br><i>Oxythrips ajugae</i><br><i>Thrips atratus</i><br><i>Thrips flavus</i><br><i>Thrips fuscipennis</i><br><i>Thrips major</i><br><i>Thrips physapus</i><br><i>Thrips tabaci</i><br><i>Thrips vulgatissimus</i>                                                                    |
| <i>Asteraceae</i>   | <i>Cirsium oleraceum</i>     | <i>Apitnothrips rufus</i><br><i>Frankliniella intonsa</i><br><i>Haplothrips aculeatus</i><br><i>Thrips atratus</i><br><i>Thrips flavus</i><br><i>Thrips fuscipennis</i><br><i>Thrips major</i><br><i>Thrips mancosetosus</i><br><i>Thrips physapus</i><br><i>Thrips tabaci</i><br><i>Thrips validus</i><br><i>Thrips vulgatissimus</i>                                                                                                                                            |
| <i>Asteraceae</i>   | <i>Cirsium palustre</i>      | <i>Chirothrips manicatus</i><br><i>Ceratothrips ericae</i><br><i>Euchaetothrips kroli</i><br><i>Frankliniella intonsa</i><br><i>Limothrips consimilis</i><br><i>Haplothrips aculeatus</i><br><i>Haplothrips distinguendus</i><br><i>Thrips atratus</i><br><i>Thrips flavus</i><br><i>Thrips fuscipennis</i><br><i>Thrips major</i><br><i>Thrips mancosetosus</i><br><i>Thrips physapus</i><br><i>Thrips tabaci</i><br><i>Tmetothrips subapterus</i><br><i>Liothrips setinodis</i> |
| <i>Asteraceae</i>   | <i>Cirsium vulgare</i>       | <i>Frankliniella intonsa</i><br><i>Thrips physapus</i>                                                                                                                                                                                                                                                                                                                                                                                                                            |
| <i>Asteraceae</i>   | <i>Crepis paludosa</i>       | <i>Thrips validus</i>                                                                                                                                                                                                                                                                                                                                                                                                                                                             |
| <i>Asteraceae</i>   | <i>Helichrysum arenarium</i> | <i>Chirothrips manicatus</i><br><i>Haplothrips arenarius</i>                                                                                                                                                                                                                                                                                                                                                                                                                      |

|                        |                             |                                                                                                                                                                                                                                                                                                                                                                                 |
|------------------------|-----------------------------|---------------------------------------------------------------------------------------------------------------------------------------------------------------------------------------------------------------------------------------------------------------------------------------------------------------------------------------------------------------------------------|
|                        |                             | <i>Haplothrips jasionis</i><br><i>Thrips fuscipennis</i><br><i>Thrips major</i><br><i>Thrips physapus</i><br><i>Thrips tabaci</i>                                                                                                                                                                                                                                               |
| <i>Asteraceae</i>      | <i>Hieracium umbellatum</i> | <i>Chirothrips manicatus</i><br><i>Frankliniella intonsa</i><br><i>Haplothrips aculeatus</i><br><i>Haplothrips arenarius</i><br><i>Haplothrips jasionis</i><br><i>Tenothrips frici</i><br><i>Thrips difficilis</i><br><i>Thrips major</i><br><i>Thrips physapus</i><br><i>Thrips tabaci</i><br><i>Thrips trehernei</i><br><i>Thrips validus</i>                                 |
| <i>Asteraceae</i>      | <i>Leontodon autumnalis</i> | <i>Frankliniella intonsa</i><br><i>Thrips physapus</i><br><i>Thrips tabaci</i><br><i>Thrips trehernei</i><br><i>Thrips validus</i>                                                                                                                                                                                                                                              |
| <i>Asteraceae</i>      | <i>Leucanthemum vulgare</i> | <i>Aeolothrips intermedius</i><br><i>Chirothrips manicatus</i><br><i>Frankliniella intonsa</i><br><i>Haplothrips aculeatus</i><br><i>Haplothrips leucanthemi</i><br><i>Thrips atratus</i><br><i>Thrips flavus</i><br><i>Thrips fuscipennis</i><br><i>Thrips major</i><br><i>Thrips physapus</i><br><i>Thrips pilichi</i><br><i>Thrips tabaci</i><br><i>Thrips vulgatissimus</i> |
| <i>Asteraceae</i>      | <i>Sonchus arvensis</i>     | <i>Frankliniella intonsa</i><br><i>Thrips atratus</i><br><i>Thrips trehernei</i>                                                                                                                                                                                                                                                                                                |
| <i>Betulaceae</i>      | <i>Betula pendula</i>       | <i>Mycterothrips consociatus</i>                                                                                                                                                                                                                                                                                                                                                |
| <i>Betulaceae</i>      | <i>Betula verrucosa</i>     | <i>Aeolothrips melaleucus</i><br><i>Chirothrips manicatus</i><br><i>Limothrips denticornis</i><br><i>Mycterothrips consociatus</i><br><i>Oxythrips ajugae</i><br><i>Oxythrips bicolor</i><br><i>Taeniothrips picipes</i><br><i>Thrips alni</i><br><i>Thrips minutissimus</i><br><i>Thrips tabaci</i>                                                                            |
| <i>Campanulaceae</i>   | <i>Jasione montana</i>      | <i>Chirothrips manicatus</i><br><i>Frankliniella intonsa</i><br><i>Haplothrips arenarius</i><br><i>Thrips physapus</i><br><i>Thrips tabaci</i>                                                                                                                                                                                                                                  |
| <i>Caprifoliaceae</i>  | <i>Succisa pratensis</i>    | <i>Frankliniella intonsa</i><br><i>Haplothrips aculeatus</i><br><i>Thrips major</i><br><i>Thrips mancosetosus</i><br><i>Thrips montanus</i><br><i>Thrips tabaci</i>                                                                                                                                                                                                             |
| <i>Caryophyllaceae</i> | <i>Stellaria media</i>      | <i>Anaphothrips obscurus</i><br><i>Frankliniella intonsa</i><br><i>Thrips atratus</i><br><i>Thrips fuscipennis</i><br><i>Thrips tabaci</i><br><i>Thrips validus</i>                                                                                                                                                                                                             |
| <i>Cupressaceae</i>    | <i>Juniperus communis</i>   | <i>Oxythrips ajugae</i><br><i>Oxythrips bicolor</i><br><i>Thrips juniperinus</i><br><i>Thrips minutissimus</i>                                                                                                                                                                                                                                                                  |

|                  |                           |                                                                                                                                                                                                                                                                                                                                                                                        |
|------------------|---------------------------|----------------------------------------------------------------------------------------------------------------------------------------------------------------------------------------------------------------------------------------------------------------------------------------------------------------------------------------------------------------------------------------|
|                  |                           | <i>Anaphothrips obscurus</i><br><i>Scolothrips uzeli</i>                                                                                                                                                                                                                                                                                                                               |
| <i>Ericaceae</i> | <i>Calluna vulgaris</i>   | <i>Anaphothrips obscurus</i><br><i>Aptinothrips rufus</i><br><i>Ceratothrips ericae</i><br><i>Chirothrips manicatus</i><br><i>Frankliniella intonsa</i><br><i>Taeniothrips picipes</i><br><i>Thrips major</i><br><i>Thrips atratus</i><br><i>Thrips flavus</i><br><i>Thrips fuscipennis</i><br><i>Thrips nigropilosus</i><br><i>Thrips tabaci</i><br><i>Cephalothrips monilicornis</i> |
| <i>Ericaceae</i> | <i>Empetrum nigrum</i>    | <i>Ceratothrips ericae</i>                                                                                                                                                                                                                                                                                                                                                             |
| <i>Ericaceae</i> | <i>Erica tetralix</i>     | <i>Ceratothrips ericae</i><br><i>Chirothrips manicatus</i><br><i>Frankliniella intonsa</i><br><i>Haplothrips aculeatus</i><br><i>Taeniothrips picipes</i><br><i>Thrips flavus</i><br><i>Thrips fuscipennis</i><br><i>Thrips major</i><br><i>Thrips physapus</i><br><i>Thrips tabaci</i>                                                                                                |
| <i>Fabaceae</i>  | <i>Cytisus scoparius</i>  | <i>Aeolothrips ericae</i><br><i>Aeolothrips intermedius</i><br><i>Frankliniella intonsa</i><br><i>Thrips angusticeps</i><br><i>Thrips atratus</i><br><i>Thrips flavus</i><br><i>Thrips fuscipennis</i><br><i>Thrips major</i><br><i>Thrips physapus</i><br><i>Thrips tabaci</i><br><i>Thrips trehernei</i><br><i>Thrips vulgatissimus</i>                                              |
| <i>Fabaceae</i>  | <i>Lathyrus japonicus</i> | <i>Chirothrips manicatus</i><br><i>Thrips atratus</i><br><i>Thrips physapus</i><br><i>Thrips tabaci</i>                                                                                                                                                                                                                                                                                |
| <i>Fabaceae</i>  | <i>Lotus corniculatus</i> | <i>Frankliniella intonsa</i>                                                                                                                                                                                                                                                                                                                                                           |
| <i>Fabaceae</i>  | <i>Vicia tetrasperma</i>  | <i>Aeolothrips fasciatus</i><br><i>Aptinothrips rufus</i><br><i>Chirothrips manicatus</i><br><i>Frankliniella intonsa</i><br><i>Thrips fuscipennis</i><br><i>Thrips major</i><br><i>Thrips physapus</i><br><i>Thrips tabaci</i>                                                                                                                                                        |
| <i>Fagaceae</i>  | <i>Fagus sylvatica</i>    | <i>Aeolothrips versicolor</i><br><i>Aptinothrips rufus</i><br><i>Dendrothrips degeeri</i><br><i>Dendrothrips saltatrix</i><br><i>Haplothrips aculeatus</i><br><i>Haplothrips phyllophilus</i><br><i>Hoplothrips pedicularius</i><br><i>Liothrips setinodis</i><br><i>Oxythrips ajugae</i><br><i>Oxythrips bicolor</i><br><i>Thrips minutissimus</i>                                    |
| <i>Fagaceae</i>  | <i>Quercus robour</i>     | <i>Aeolothrips melaleucus</i><br><i>Aeolothrips versicolor</i><br><i>Anaphothrips obscurus</i><br><i>Chirothrips manicatus</i><br><i>Haplothrips aculeatus</i><br><i>Haplothrips phyllophilus</i><br><i>Hoplothrips corticis</i><br><i>Liothrips setinodis</i>                                                                                                                         |

|                      |                              |                                                                                                                                                                                                                                                                                                                                                                                                                               |
|----------------------|------------------------------|-------------------------------------------------------------------------------------------------------------------------------------------------------------------------------------------------------------------------------------------------------------------------------------------------------------------------------------------------------------------------------------------------------------------------------|
|                      |                              | <i>Megathrips lativentris</i><br><i>Mycterothrips albidicornis</i><br><i>Oxythrips ajugae</i><br><i>Oxythrips bicolor</i><br><i>Phlaeothrips coriaceus</i><br><i>Taeniothrips picipes</i><br><i>Thrips alni</i><br><i>Thrips fuscipennis</i><br><i>Thrips major</i><br><i>Thrips minutissimus</i><br><i>Thrips pini</i><br><i>Xylaplothrips fuliginosus</i>                                                                   |
| <i>Iridaceae</i>     | <i>Iris pseudacorus</i>      | <i>Iridothrips iridis</i>                                                                                                                                                                                                                                                                                                                                                                                                     |
| <i>Juncaceae</i>     | <i>Juncus effusus</i>        | <i>Aptinothrips rufus</i><br><i>Chirothrips manicatus</i><br><i>Oxythrips bicolor</i><br><i>Iridothrips iridis</i>                                                                                                                                                                                                                                                                                                            |
| <i>Lamiaceae</i>     | <i>Stachys palustris</i>     | <i>Frankliniella intonsa</i><br><i>Haplothrips aculeatus</i><br><i>Taeniothrips zurstrasseni</i><br><i>Thrips fuscipennis</i><br><i>Thrips major</i>                                                                                                                                                                                                                                                                          |
| <i>Lamiaceae</i>     | <i>Galeopsis tetrahit</i>    | <i>Chirothrips manicatus</i><br><i>Frankliniella intonsa</i><br><i>Thrips fuscipennis</i>                                                                                                                                                                                                                                                                                                                                     |
| <i>Lythraceae</i>    | <i>Lythrum salicaria</i>     | <i>Aeolothrips fasciatus</i><br><i>Aeolothrips intermedius</i><br><i>Aptinothrips rufus</i><br><i>Aptinothrips stylifer</i><br><i>Frankliniella intonsa</i><br><i>Haplothrips aculeatus</i><br><i>Mycterothrips consociatus</i><br><i>Taeniothrips zurstrasseni</i><br><i>Thrips atratus</i><br><i>Thrips fuscipennis</i><br><i>Thrips physapus</i><br><i>Thrips trehernei</i><br><i>Thrips major</i><br><i>Thrips tabaci</i> |
| <i>Menyanthaceae</i> | <i>Menyanthes trifoliata</i> | <i>Anaphothrips obscurus</i><br><i>Thrips fuscipennis</i><br><i>Thrips menyanthidis</i>                                                                                                                                                                                                                                                                                                                                       |
| <i>Orchidaceae</i>   | <i>Epipactis atrorubens</i>  | <i>Aptinothrips rufus</i><br><i>Haplothrips aculeatus</i><br><i>Thrips tabaci</i>                                                                                                                                                                                                                                                                                                                                             |
| <i>Orchidaceae</i>   | <i>Goodyera repens</i>       | <i>Thrips validus</i>                                                                                                                                                                                                                                                                                                                                                                                                         |
| <i>Orobanchaceae</i> | <i>Euphrasia stricta</i>     | <i>Aeolothrips fasciatus</i><br><i>Aeolothrips intermedius</i><br><i>Frankliniella intonsa</i><br><i>Thrips dilatatus</i><br><i>Thrips mancosetosus</i>                                                                                                                                                                                                                                                                       |
| <i>Orobanchaceae</i> | <i>Melampyrum pratense</i>   | <i>Aeolothrips intermedius</i><br><i>Aeolothrips ericae</i><br><i>Aptinothrips rufus</i><br><i>Aptinothrips stylifer</i><br><i>Ceratothrips ericae</i><br><i>Frankliniella intonsa</i><br><i>Haplothrips aculeatus</i><br><i>Mycterothrips latus</i><br><i>Taeniothrips picipes</i><br><i>Thrips flavus</i><br><i>Thrips major</i><br><i>Thrips tabaci</i>                                                                    |
| <i>Orobanchaceae</i> | <i>Rhinanthus serotinus</i>  | <i>Aeolothrips fasciatus</i><br><i>Aeolothrips intermedius</i><br><i>Aptinothrips stylifer</i><br><i>Frankliniella intonsa</i><br><i>Haplothrips aculeatus</i><br><i>Thrips atratus</i><br><i>Thrips dilatatus</i><br><i>Thrips flavus</i>                                                                                                                                                                                    |

|                       |                              |                                                                                                                                                                                                                                                                                                                                                                                                                                                    |
|-----------------------|------------------------------|----------------------------------------------------------------------------------------------------------------------------------------------------------------------------------------------------------------------------------------------------------------------------------------------------------------------------------------------------------------------------------------------------------------------------------------------------|
|                       |                              | <i>Thrips fuscipennis</i><br><i>Thrips major</i><br><i>Thrips montanus</i><br><i>Thrips tabaci</i>                                                                                                                                                                                                                                                                                                                                                 |
| <i>Pinaceae</i>       | <i>Larix europaea</i>        | <i>Aeolothrips melaleucus</i><br><i>Aptinothrips stylifer</i><br><i>Chirothrips manicatus</i><br><i>Limothrips cerealium</i><br><i>Mycterothrips consociatus</i>                                                                                                                                                                                                                                                                                   |
| <i>Pinaceae</i>       | <i>Picea alba</i>            | <i>Oxythrips ajugae</i><br><i>Oxythrips bicolor</i><br><i>Thrips minutissimus</i><br><i>Liothrips setinodis</i><br><i>Mycterothrips consociatus</i><br><i>Thrips pini</i>                                                                                                                                                                                                                                                                          |
| <i>Pinaceae</i>       | <i>Pinus sylvestris</i>      | <i>Chirothrips manicatus</i><br><i>Ceratothrips ericae</i><br><i>Oxythrips ajugae</i><br><i>Oxythrips bicolor</i><br><i>Thrips minutissimus</i><br><i>Thrips tabaci</i>                                                                                                                                                                                                                                                                            |
| <i>Plantaginaceae</i> | <i>Veronica chamaedrys</i>   | <i>Aeolothrips intermedius</i><br><i>Apitnothrips rufus</i><br><i>Aptinothrips stylifer</i><br><i>Frankliniella intonsa</i><br><i>Haplothrips distinguendus</i><br><i>Haplothrips leucanthemi</i><br><i>Pezothrips frontalis</i><br><i>Theilopodothrips pilosus</i><br><i>Thrips nigropilosus</i>                                                                                                                                                  |
| <i>Plantaginaceae</i> | <i>Linaria vulgaris</i>      | <i>Frankliniella intonsa</i><br><i>Thrips tabaci</i>                                                                                                                                                                                                                                                                                                                                                                                               |
| <i>Plumbaginaceae</i> | <i>Armeria maritima</i>      | <i>Aeolothrips intermedius</i><br><i>Apitnothrips rufus</i><br><i>Aptinothrips stylifer</i><br><i>Frankliniella intonsa</i><br><i>Haplothrips aculeatus</i><br><i>Haplothrips distinguendus</i><br><i>Haplothrips statice</i><br><i>Limothrips cerealium</i><br><i>Thrips atratus</i><br><i>Thrips flavus</i><br><i>Thrips fuscipennis</i><br><i>Thrips major</i><br><i>Thrips physapus</i><br><i>Thrips tabaci</i><br><i>Thrips vulgatissimus</i> |
| <i>Poaceae</i>        | <i>Ammophila arenaria</i>    | <i>Euchaetothrips kromi</i><br><i>Hemianaphothrips articulatus</i>                                                                                                                                                                                                                                                                                                                                                                                 |
| <i>Poaceae</i>        | <i>xCalammophila baltica</i> | <i>Hemianaphothrips articulatus</i><br><i>Chirothrips manicatus</i>                                                                                                                                                                                                                                                                                                                                                                                |
| <i>Poaceae</i>        | <i>Glyceria maxima</i>       | <i>Euchaetothrips kromi</i><br><i>Hemianaphothrips articulatus</i>                                                                                                                                                                                                                                                                                                                                                                                 |
| <i>Poaceae</i>        | <i>Phragmites australis</i>  | <i>Chirothrips manicatus</i><br><i>Haplothrips aculeatus</i>                                                                                                                                                                                                                                                                                                                                                                                       |
| <i>Polygonaceae</i>   | <i>Polygonum bistorta</i>    | <i>Aeolothrips intermedius</i><br><i>Frankliniella intonsa</i><br><i>Haplothrips aculeatus</i><br><i>Thrips atratus</i><br><i>Thrips fuscipennis</i><br><i>Thrips mancosetosus</i><br><i>Thrips tabaci</i><br><i>Thrips validus</i><br><i>Thrips vulgatissimus</i>                                                                                                                                                                                 |
| <i>Polygonaceae</i>   | <i>Rumex acetosa</i>         | <i>Frankliniella intonsa</i><br><i>Haplothrips aculeatus</i><br><i>Thrips fuscipennis</i><br><i>Thrips tabaci</i><br><i>Thrips vulgatissimus</i>                                                                                                                                                                                                                                                                                                   |
| <i>Primulaceae</i>    | <i>Lysimachia vulgaris</i>   | <i>Frankliniella intonsa</i>                                                                                                                                                                                                                                                                                                                                                                                                                       |

|                      |                                                       |                                                                                                                                                                                                                                                                                                                                                                                                       |
|----------------------|-------------------------------------------------------|-------------------------------------------------------------------------------------------------------------------------------------------------------------------------------------------------------------------------------------------------------------------------------------------------------------------------------------------------------------------------------------------------------|
|                      |                                                       | <i>Thrips fuscipennis</i>                                                                                                                                                                                                                                                                                                                                                                             |
| <i>Ranunculaceae</i> | <i>Ranunculus acris i</i><br><i>Ranunculus repens</i> | <i>Apitnothrips rufus</i><br><i>Chirothrips manicatus</i><br><i>Frankliniella intonsa</i><br><i>Oxythrips bicolor</i><br><i>Thrips angusticeps</i><br><i>Thrips discolor</i><br><i>Thrips fuscipennis</i><br><i>Thrips major</i><br><i>Thrips minutissimus</i><br><i>Thrips physapus</i><br><i>Thrips tabaci</i><br><i>Thrips trehernei</i><br><i>Thrips validus</i><br><i>Thrips vulgatissimus</i>   |
| <i>Rhamnaceae</i>    | <i>Frangula alnus</i>                                 | <i>Aptinothrips stylifer</i><br><i>Haplothrips aculeatus</i><br><i>Haplothrips phyllophilus</i><br><i>Mycterothrips consociatus</i><br><i>Thrips fuscipennis</i><br><i>Thrips major</i><br><i>Thrips sambuci</i>                                                                                                                                                                                      |
| <i>Rosaceae</i>      | <i>Geum rivale</i>                                    | <i>Anaphothrips obscurus</i><br><i>Chirothrips manicatus</i><br><i>Frankliniella intonsa</i><br><i>Thrips fuscipennis</i>                                                                                                                                                                                                                                                                             |
| <i>Rosaceae</i>      | <i>Padus avium</i>                                    | <i>Haplothrips phyllophilus</i><br><i>Oxythrips ajugae</i><br><i>Oxythrips bicolor</i><br><i>Thrips minutissimus</i>                                                                                                                                                                                                                                                                                  |
| <i>Rosaceae</i>      | <i>Sorbus aucuparia</i>                               | <i>Haplothrips phyllophilus</i><br><i>Oxythrips ajugae</i><br><i>Oxythrips bicolor</i><br><i>Thrips minutissimus</i><br><i>Thrips major</i><br><i>Thrips sambuci</i><br><i>Thrips tabaci</i>                                                                                                                                                                                                          |
| <i>Rubiaceae</i>     | <i>Galium mollugo</i>                                 | <i>Aeolothrips intermedius</i><br><i>Anaphothrips obscurus</i><br><i>Apitnothrips rufus</i><br><i>Chirothrips manicatus</i><br><i>Frankliniella intonsa</i><br><i>Haplothrips aculeatus</i><br><i>Mycterothrips salicis</i><br><i>Platythrips tunicatus</i><br><i>Rubiothrips silvarum</i><br><i>Rubiothrips sordidus</i><br><i>Thrips fuscipennis</i><br><i>Thrips major</i><br><i>Thrips tabaci</i> |
| <i>Rubiaceae</i>     | <i>Galium palustre</i>                                | <i>Anaphothrips obscurus</i><br><i>Aptinothrips stylifer</i><br><i>Euchaetothrips krolī</i>                                                                                                                                                                                                                                                                                                           |
| <i>Salicaceae</i>    | <i>Salix sp.</i>                                      | <i>Mycterothrips salicis</i>                                                                                                                                                                                                                                                                                                                                                                          |
